# Supplementary material for: Breaking the reduced glutathione-activated antioxidant defence for enhanced photodynamic therapy
Source: Royal Society of Chemistry journal article supplement (doi:10.1039/c7tb01233k), 2017-01-01
Supplement: c7tb01233k1.pdf [file c7tb01233k1.pdf]

## Reduced glutathione-activated antioxidant defence breaking for enhanced photodynamic therapy

Qi-chen Zhan,<sup>† a</sup> Xian-qing Shi,<sup>† a</sup> Xiao-hong Yan,<sup>a</sup> Qian Liu,<sup>b</sup> Jia-hong Zhou,<sup>a</sup> Lin Zhou,<sup>\*a</sup> and Shao-hua Wei<sup>\*a</sup>

<sup>a</sup> College of Chemistry and Materials Science, Jiangsu Key Laboratory of Biofunctional Materials, Jiangsu Collaborative Innovation Centre of Biomedical Functional Materials, Key Laboratory of Applied Photochemistry, Nanjing Normal University Nanjing (210023) P. R. China. \*E-mail: zhoulin@njnu.edu.cn (L. Zhou); shwei@njnu.edu.cn (S. H. Wei); Tel: +86-025-8589-1761

<sup>b</sup> Department of Neurology, Jinling Hospital, Medical School of Nanjing University 305 East Zhongshan Road, Nanjing, Jiangsu (210002) P. R. China

<sup>†</sup> Contributed equally to this work.

According to the previous reports, each  $\text{Hg}^{2+}$  can coordinate with two thymine to form a stable T-Hg-T complex. There are 8 thymine groups in ZnPc3. So, in theory, the mol ratio of ZnPc3 and  $\text{Hg}^{2+}$  in ZHNP should be 4:1. In our manuscript, we prepared ZHNP in following procedure. ZnPc3 (2.0  $\mu\text{M}$ ) and excess  $\text{HgSO}_4$  (16.0  $\mu\text{M}$ ) were mixed in methanol and stirred for 30 min to form ZHNP. The result ZHNP was purified by dialysis the solution using a 12-14 kDa cut-off cellulose membrane for 24 h to remove the unchelate  $\text{Hg}^{2+}$ . We had studied the interaction ratio between ZnPc3 and  $\text{Hg}^{2+}$  by UV-visible spectra.

As showed in Figure S1A, the absorption peak of ZnPc3 at 685 nm gradually decreased and blue-shifted upon increasing the concentration of  $\text{Hg}^{2+}$ . The absorbance intensity was plotted against the molar ratio of  $[\text{Hg}^{2+}]/[\text{ZnPc3}]$  (Figure S1B). Two straight lines of different slopes can be derived from the plot, and the molar ratio where the two lines cross reflects the composition of the complex. Y reaches the minimum at the molar fraction of ZnPc3 identical to that in the complex. So,  $\text{Hg}^{2+}$  forms 4:1 complexes with ZnPc3 (mol ratio).

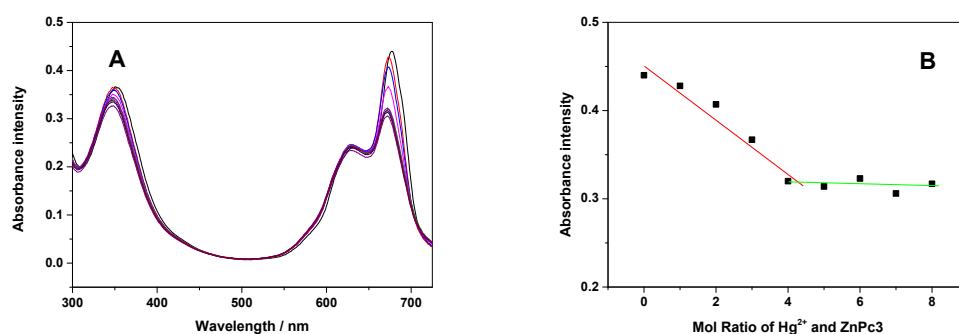

**Figure S1.** (A) Absorption spectra change of ZnPc3 by addition of  $\text{Hg}^{2+}$  ( $[\text{ZnPc3}] = 5 \mu\text{M}$ ;  $[\text{Hg}^{2+}] = 0, 5, 10, 15, 20, 25, 30, 35, 40 \mu\text{M}$ ); (B) Obtained by plotting the maximum absorbance intensity as a function of the molar ratio of  $\text{Hg}^{2+}$  in A.
